# Supplementary material
Source: HighWire-hosted journal article supplement (http://cmajopen.ca/highwire/filestream/81327/field_highwire_adjunct_files/1/2019-0165-original-submission.pdf)

1  
2  
3 **1 Trends in very early discharge from hospital for Ontario midwifery clients from 2003-**  
4  
5 **2 2017: a cohort study**  
6  
7

8  
9  
10  
11 **3**  
12  
13 4 Authors: Elizabeth Kathleen Darling, RM, MSc, PhD<sup>1,2</sup>  
14

15 5 Glenda Babe, MA, PhD(c)<sup>3</sup>  
16

17 6 Carla Sorbara, RM, MSc<sup>4,5</sup>  
18

19 7 Richard Perez, MSc<sup>3</sup>  
20  
21

22 **8**

- 23 9  
24 10  
25 11  
26 12  
27 13  
28 14  
29 15  
30 16  
31 17  
32 18  
33 19  
34 20  
35 21  
36 22  
37 23  
38 24  
39 25  
40 26  
41 27  
42 28  
43 29  
44 30  
45 31  
46 32  
47 33  
48 34  
49 35  
50 36  
51 37  
52 38  
53 39  
54 40  
55 41  
56 42  
57 43  
58 44  
59 45  
60 46  
61 47  
62 48  
63 49  
64 50  
65 51  
66 52  
67 53  
68 54  
69 55  
70 56  
71 57  
72 58  
73 59  
74 60
1. Department of Obstetrics & Gynecology, McMaster University, Hamilton, ON
  2. McMaster Midwifery Research Centre, McMaster University, Hamilton, ON
  3. ICES, Hamilton, ON
  4. Midwifery Education Program, Ryerson University, Toronto, ON
  5. Institute of Health Policy, Management and Evaluation, University of Toronto, Toronto, ON

17 Corresponding Author: Elizabeth Kathleen Darling

18 Email: [darlinek@mcmaster.ca](mailto:darlinek@mcmaster.ca)

19 Address: McMaster University, HSC-4H24K, 1280 Main St W, Hamilton, ON L8S 4K1

20 Tel: 905.525.9140 ext. 21597

21 Fax: 905.523.6459  
22

23 This study was supported by ICES, which is funded by an annual grant from the Ontario  
24 Ministry of Health and Long-Term Care (MOHLTC). Dr. Darling was also supported by the  
25 Department of Obstetrics & Gynecology, McMaster University. The analyses, conclusions,  
26 opinions and statements expressed herein are solely those of the authors and do not reflect those  
27 of the funding or data sources; no endorsement is intended or should be inferred.  
28  
29

30 The authors have no conflicts of interest to declare.

31 **Word count (max 2500 words): 2429**  
32  
33  
34  
35  
36  
37  
38  
39  
40  
41  
42  
43  
44  
45  
46  
47  
48  
49  
50  
51  
52  
53  
54  
55  
56  
57  
58  
59  
60

1  
2  
3 **31 Abstract (250 words)**  
4  
5

6 **32 Background:** Very early discharge from hospital following birth is an element of Ontario  
7  
8 **33** midwifery care. Our objective was to determine if the proportion of babies under Ontario  
9  
10 **34** midwifery care who experience very early hospital discharge has changed over time.

11  
12  
13  
14 **35 Methods:** We conducted a retrospective, population-based cohort study, including all term  
15  
16 **36** newborns born by spontaneous vaginal birth at an Ontario hospital between 2003-2017 who were  
17  
18 **37** attended by midwives. Our primary outcome was very early discharge from hospital for the  
19  
20 **38** newborn, which was defined as discharge <6 hours after birth. Secondary outcomes were  
21  
22 **39** pediatric consultation prior to hospital discharge, phototherapy prior to hospital discharge, and  
23  
24 **40** readmission for treatment of jaundice.  
25  
26  
27

28  
29 **41 Results:** The study cohort included 102,014 newborns. There was a small absolute decrease in  
30  
31 **42** very early discharge, from 34.2% in 2003-04 to 30.7% in 2016-17. Rates of pediatric  
32  
33 **43** consultation, phototherapy prior to hospital discharge, and readmission for jaundice have all  
34  
35 **44** risen slightly. In 2016-17, rates of very early discharge ranged from 5.6% to 71.3% across 73  
36  
37 **45** Ontario hospitals. The change in very early discharge rates in the 39 hospitals where midwives  
38  
39 **46** were conducting births in both 2003-04 and 2016-17 ranged from an increase of 21.1% to a  
40  
41 **47** decrease of 39.2%.  
42  
43  
44

45  
46 **48 Interpretation:** Wide variation across Ontario in very early discharge rates for midwifery clients  
47  
48 **49** points to room for improvement to make more efficient use of health care resources. Further  
49  
50 **50** research to identify the factors that influence rates of very early discharge could help to inform  
51  
52 **51** efforts to promote optimal levels of early discharge.  
53  
54

55  
56 **52 Keywords:** midwifery; infant, newborn; term birth; patient discharge; length of stay  
57  
58  
59  
60

## 53 Introduction

54 Very early discharge from hospital following birth has been an element of the Ontario model of  
55 midwifery care since the profession was originally regulated and funded in 1994.<sup>1</sup> Midwifery  
56 clients and their newborns who have uncomplicated births are eligible for discharge within 3-4  
57 hours of birth.<sup>2</sup> A complete newborn exam is conducted by the attending midwife prior to  
58 hospital discharge. Postpartum care in the first week is then provided in the home, with the first  
59 visit typically occurring within approximately 24 hours of the birth.<sup>3</sup> Postpartum home visits  
60 include breastfeeding support, and the Ontario model of midwifery care has demonstrated good  
61 maternal and neonatal outcomes, including high rates of breastfeeding.<sup>3-6</sup> Research evidence  
62 shows that if antenatal care is adequate and there is good follow-up, early discharge yields good  
63 parent satisfaction.<sup>7</sup> Early discharge from hospital for midwife-attended hospital births represents  
64 a cost-savings to the health care system. Changes to the rate of very early discharge for  
65 midwifery clients are important as they may impact the cost-effectiveness of midwifery care.

66 Over time, a variety of changes in policy and practice may have influenced rates of very early  
67 discharge for Ontario midwifery clients.<sup>8,9</sup> One example of this is the provincial government's  
68 2003 policy of offering a 60-hour postpartum stay to anyone who wanted it.<sup>9</sup> Another factor has  
69 been the introduction of universal bilirubin screening for newborns, which typically is performed  
70 at or beyond 24 hours of age.<sup>8,10</sup> Universal bilirubin screening was gradually adopted in Ontario  
71 following publication of the Canadian Pediatric Society's (CPS) 2007 hyperbilirubinemia  
72 guideline<sup>8,11</sup> and has been more actively promoted through a provincial hyperbilirubinemia  
73 quality-based procedure (QBP) published in 2013.<sup>12</sup> In response to anecdotal evidence that in  
74 some Ontario hospitals the proportion of midwifery clients being discharged early has decreased,  
75 we conducted a study with the objective of quantifying the patterns of early discharge among

1  
2  
3 76 Ontario midwifery clients. Our primary research question was “Has the proportion of babies  
4  
5 77 under the care of Ontario midwives who experience early discharge from hospital following a  
6  
7 78 spontaneous vaginal birth changed over time?” Our secondary question was “Has there has been  
8  
9 79 variation in this rate between hospitals?”  
10  
11  
12

## 13 80 **Methods**

14  
15

16 81 We conducted a retrospective population-based cohort study that included all term newborns  
17  
18 82 born by spontaneous vaginal birth at an Ontario hospital between April 1, 2003, and February 28,  
19  
20 83 2017 who were attended by midwives. The study was conducted at ICES, an independent, non-  
21  
22 84 profit research institute whose legal status under Ontario’s health information privacy law allows  
23  
24 85 it to collect and analyze health care and demographic data, without consent, for health system  
25  
26 86 evaluation and improvement. These datasets were linked using unique encoded identifiers and  
27  
28 87 analyzed at ICES. We used data from ICES’s MOMBABY dataset, which links the inpatient  
29  
30 88 admission records of people who give birth at an Ontario hospital and with the records of their  
31  
32 89 newborns using data from the Discharge Abstract Database (DAD), a national database that  
33  
34 90 captures administrative, clinical and demographic information on all hospital discharges. We  
35  
36 91 used service provider type codes that are captured in the DAD to determine whether or not a  
37  
38 92 registered midwife was one of the care providers during the intrapartum hospital admission. We  
39  
40 93 excluded births that occurred prior to 37 weeks gestation, stillbirths, multiple births, and non-  
41  
42 94 cephalic presentations. We excluded cases where the time of birth or time of discharge were  
43  
44 95 missing from the record, and excluded all cases where the length of hospital stay was greater  
45  
46 96 than 4000 hours (5.4 months). We also excluded all newborns who were admitted to one of the  
47  
48 97 provinces two pediatric hospitals (which do not conduct births).  
49  
50  
51  
52  
53  
54  
55  
56  
57  
58  
59  
60

1  
2  
3 98 Our primary outcome was very early discharge from hospital for the newborn. We calculated  
4  
5 99 length of stay using time of birth and time of hospital discharge and then created a dichotomous  
6  
7  
8 100 variable based on defining the primary outcome as discharge <6 hours after birth. Our three  
9  
10 101 secondary outcomes were pediatric consultation prior to hospital discharge, phototherapy prior to  
11  
12 102 hospital discharge, and readmission for treatment of jaundice (See Supplementary Table 1 for the  
13  
14 103 codes used to create these variables). We identified the following covariates a priori: maternal  
15  
16  
17 104 factors - maternal parity (primiparous vs. multiparous), rural residence (based on maternal postal  
18  
19 105 code and determined using PCCF+),<sup>13</sup> maternal material deprivation (measured in quintiles using  
20  
21 106 the Ontario Marginalization Index<sup>14</sup>), diabetes, and hypertension; newborn factors - gestational  
22  
23 107 age category (37-38 weeks, 39-40 weeks, 41+ weeks); hospital factors – annual birth volume  
24  
25 108 ( $\leq 500$ , 501-1000, 1001-2000,  $\geq 2001$ ), proportion of total births attended by midwives (<10%,  
26  
27 109 10-20%, >20%); and policy factors – the CPS guidelines (2007 onwards), Ontario’s  
28  
29 110 hyperbilirubinemia QBP (2013 onwards). We also conducted a secondary analysis of the crude  
30  
31 111 annual rates of early discharge after excluding all newborns where the birth was conducted by a  
32  
33 112 physician (See Supplementary Table 1 for the codes used to exclude physician births).  
34  
35  
36  
37  
38 113 We calculated the frequency of each outcome by fiscal year, and graphed the trends over time.  
39  
40 114 We used log binomial regression (using the GLIMMIX procedure) to model the relationship  
41  
42 115 between covariates and the primary outcome (very early discharge), and to calculate relative  
43  
44 116 risks. We used complete case analysis for our regression models (i.e., cases with missing values  
45  
46 117 for any covariate were excluded from the models), because less than 2% of our very large cohort  
47  
48 118 was missing data, and missing data were missing at random. This approach to handling missing  
49  
50 119 data is valid and simple given these conditions.<sup>15</sup> We also calculated rates of very early discharge  
51  
52 120 for each hospital by fiscal year to examine individual hospital trends and changes over time, and  
53  
54  
55  
56  
57  
58  
59  
60

1  
2  
3 121 to compare overall rates of very early discharge between hospitals. All analyses were conducted  
4  
5 122 using SAS version 9.4.  
6  
7

8  
9 123 The use of data in this project was authorized under section 45 of Ontario's Personal Health  
10  
11 124 Information Protection Act, which does not require review by a Research Ethics Board.  
12  
13

## 14 125 **Results**

15  
16

17 126 Figure 1 shows the cohort creation flow diagram. The study cohort included 102,014 newborns.  
18  
19 127 The characteristics of included newborns are shown in Table 1. Newborns who were discharged  
20  
21 128 from hospital within six hours of birth were more likely to be born to an older, multiparous  
22  
23 129 mother, and less likely to be born before 39 weeks or after 40 weeks, to live in a rural area or a  
24  
25 130 neighborhood with high levels of material deprivation, or to be born to a mother with diabetes or  
26  
27 131 hypertension.  
28  
29

30  
31  
32 132 Figure 2 shows the crude rate of very early discharge for term, singleton, cephalic newborns born  
33  
34 133 via spontaneous vaginal birth by fiscal year for all births in the study cohort and for just those  
35  
36 134 conducted by midwives (n=86,412). There was a small absolute decrease in this rate over time,  
37  
38 135 from 34.2% in 2003-04 to 30.7% in 2016-17 for the whole study cohort. After excluding  
39  
40 136 physician-conducted births this rate was roughly 3% higher but followed a similar trend. Figure  
41  
42 137 3 shows the overall rate of pediatric consultation, phototherapy prior to hospital discharge, and  
43  
44 138 readmission for jaundice during this same time period, with the rates of all three rising slightly.  
45  
46 139 Univariate analyses for our two policy factors (the CPS hyperbilirubinemia guidelines, and  
47  
48 140 Ontario's hyperbilirubinemia QBP) found no statistically significant change associated with  
49  
50 141 these variables so they were not included in the final model. Results of the final model are shown  
51  
52 142 in Table 2. After adjusting for maternal parity, rural residence, maternal socioeconomic status,  
53  
54  
55  
56  
57  
58  
59  
60

1  
2  
3 143 gestational age at birth, diabetes, and hypertension, we found a small underlying temporal trend  
4  
5 144 of a decreasing rate of very early discharge each year (RR: 0.99, 95% CI: 0.988,0.998; p=0.013).  
6  
7  
8 145 Multiparity was associated with higher rates of early discharge, while rural residence and being  
9  
10 146 in the lowest two material deprivation quintiles was associated with lower rates of early  
11  
12 147 discharge. Additional variation in rates of early discharge was associated with hospital  
13  
14 148 characteristics: newborns born at hospitals with >2000 births per year were more likely to be  
15  
16 149 discharged from hospital early, while those born at hospitals with a higher proportion of births  
17  
18 150 attended by midwives were less likely to be discharged early.  
19  
20  
21

22 151 We found wide variation in the rates of very early discharge by hospital. Figure 4 shows that in  
23  
24 152 2016-17, the rates of very early discharge ranged from 5.6% to 71.3% across seventy-three  
25  
26 153 different Ontario hospitals. We examined trends in the rates of very early discharge for each  
27  
28 154 hospital over time, and examined changes around the times that new hyperbilirubinemia  
29  
30 155 guidelines were released (2007 and 2013). There were no consistent patterns in the rate of very  
31  
32 156 early discharge in relation to these policy changes. This inconsistency is illustrated in Figure 5,  
33  
34 157 which shows the change in rates of very early discharge in the 39 hospitals where midwives were  
35  
36 158 conducting births in both 2003-04 and 2016-17, which ranged from an increase of 21.1% to a  
37  
38 159 decrease of 39.2%.  
39  
40  
41  
42  
43

## 44 160 **Discussion**

45  
46  
47 161 We found a lower overall rate of very early discharge from hospital for term newborns born by  
48  
49 162 spontaneous vaginal birth at an Ontario hospital who were attended by midwives than we  
50  
51 163 anticipated. Although the intended model for Ontario midwifery care includes very early  
52  
53 164 discharge from hospital where clinically appropriate, and midwife-attended spontaneous vaginal  
54  
55  
56  
57  
58  
59  
60

1  
2  
3 165 births are generally a low risk cohort, less than a third of our cohort left the hospital within 6  
4  
5 166 hours of birth. We also found wide variation between hospitals in rates of very early discharge  
6  
7  
8 167 and in how these rates have varied over time, with the highest rates being more than twice the  
9  
10 168 mean rate. While the pattern of very early discharge was not associated with policy factors  
11  
12 169 related to universal hyperbilirubinemia screening, we observed temporal increases in the rates of  
13  
14 170 pediatric consultation, phototherapy treatment prior to hospital discharge, and readmission for  
15  
16 171 jaundice which reflect changes in midwives' clinical practice related to hyperbilirubinemia  
17  
18  
19 172 screening.

21  
22 173 We were unable to find any other publications examining the rates of very early discharge in  
23  
24 174 Canada. Outside of the midwifery model of care, early discharge has been defined variously as  
25  
26 175 discharge on the same day as birth or discharge within 24-48 hours.<sup>16-18</sup> A 2012 survey of  
27  
28 176 Canadian hospitals found that the length of stay following vaginal births decreased from 3.2 days  
29  
30 177 in 1993 to 2.0 days in 2012.<sup>19</sup> While the length of stay for term singleton vaginal births attended  
31  
32 178 by any health care professional in Canada has decreased over time,<sup>16,20</sup> outside of the context of  
33  
34 179 midwifery care, very early discharge is not supported in Canada by current guidelines or service  
35  
36 180 delivery models (which do not typically provide in-home early postpartum care from a primary  
37  
38 181 care provider). As would be expected, given the rates of very early discharge in our study, the  
39  
40 182 rate of phototherapy prior to hospital discharge was lower than for non-midwife-attended births  
41  
42 183 in Ontario during the same time frame.<sup>10</sup> Between 2003-2011, rates of readmission for jaundice  
43  
44 184 in our study were similar to previously reported rates for the rest of the Ontario population.<sup>10</sup>  
45  
46 185 The factors contributing to variation in rates of very early discharge are complex. Our finding  
47  
48 186 that there was not a consistent association between length of stay and policy factors related to  
49  
50 187 hyperbilirubinemia screening makes sense given that a) implementation of the CPS  
51  
52  
53  
54  
55  
56  
57  
58  
59  
60



1  
2  
3 188 hyperbilirubinemia guidelines occurred very gradually across Ontario hospitals, and b) the ways  
4  
5 189 in which hospitals operationalized screening varied.<sup>8</sup> A survey of Ontario midwives found that  
6  
7 190 logistical barriers to offering bilirubin screening after hospital discharge have been overcome by  
8  
9 191 midwives in some communities but persist in others.<sup>21</sup> Presentation of the preliminary findings  
10  
11 192 presented in this paper to audiences of midwives confirmed that hyperbilirubinemia screening is  
12  
13 193 not the only factor influencing rates of very early discharge. Differences between hospital  
14  
15 194 recommendations for minimum length of stay following epidural anesthesia, for example, or for  
16  
17 195 ruling out newborn sepsis, will likely contribute to differences in practice related to early  
18  
19 196 discharge. Variation in rates of very early discharge is also influenced by other contextual factors  
20  
21 197 including hospital staffing and structural capacity, budgetary constraints driving a push to  
22  
23 198 shorten length of stay, and championing of clinical protocols that do not take into consideration  
24  
25 199 the in-home follow-up that midwives provide. Finally, very early discharge may impact  
26  
27 200 midwives' workload, and anecdotally there appears to be variation in how this element of  
28  
29 201 midwifery care is promoted by midwives to midwifery clients.

30  
31 202 Our study has several limitations. First, midwifery care was integrated into the Ontario health  
32  
33 203 care system in 1994 but some of the key variables needed for our study (e.g., gestational age)  
34  
35 204 were not collected until 2003. Therefore, we could not examine rates of very early discharge  
36  
37 205 from 1994 to 2003. Second, we expect that some newborns in the cohort had valid clinical  
38  
39 206 reasons not to be discharged very early. However, we did not have access to full clinical records  
40  
41 207 and were unable to identify neonatal clinical factors warranting a longer stay in hospital, or  
42  
43 208 measure if this proportion changed over time or varied between hospitals. Third, we chose to  
44  
45 209 include all midwife-attended births even though in some cases there may have been a transfer of  
46  
47 210 care to a physician (our secondary analysis showed that about 16% of births were conducted by a  
48  
49  
50  
51  
52  
53  
54  
55  
56  
57  
58  
59  
60

1  
2  
3 211 physician). Although births conducted by a physician may have involved some kind of  
4  
5 212 complication that would influence suitability for very early discharge, we have shown elsewhere  
6  
7 213 that a high proportion of transfers of care from midwives to obstetricians occur in situations  
8  
9  
10 214 where there is not a clinical indication.<sup>22</sup> We chose not to exclude physician-conducted births  
11  
12 215 because from a policy and health resource perspective it is useful to describe the outcomes for all  
13  
14 216 midwife-attended births. Finally, given the limitations inherent to retrospective cohort studies,  
15  
16  
17 217 our findings do not allow us to draw any conclusions about causal factors contributing to the  
18  
19 218 trend and variation in rates of very early discharge.

22 219 The wide variation across Ontario hospitals in rates of very early discharge for midwifery clients  
23  
24 220 points to room for improvement to make more efficient use of health care resources. The safety  
25  
26 221 of early discharge accompanied by in-home postpartum care is supported by evidence from  
27  
28 222 RCTs,<sup>23-25</sup> and is corroborated in the context of Ontario midwifery care by population-based  
29  
30 223 studies which demonstrate very low rates of neonatal morbidity and mortality.<sup>26,27</sup> While not all  
31  
32 224 midwifery clients will be appropriate candidates for very early discharge, it is incumbent upon  
33  
34 225 both midwives and hospital to examine how very early discharge can be facilitated when  
35  
36 226 appropriate. Ensuring that midwives are involved in developing clinical protocols that will  
37  
38 227 impact the care they provide may help contribute towards this objective. Finally, the myriad of  
39  
40 228 factors driving rates of very early discharge are not well understood; further research to identify  
41  
42 229 the hospital, midwife, and midwifery client level factors that influence rates of very early  
43  
44 230 discharge could help to inform efforts to promote optimal levels of early discharge.

51 231

53 232

55 233

1  
2  
3  
4  
5  
6  
7  
8  
9  
10  
11  
12  
13  
14  
15  
16  
17  
18  
19  
20  
21  
22  
23  
24  
25  
26  
27  
28  
29  
30  
31  
32  
33  
34  
35  
36  
37  
38  
39  
40  
41  
42  
43  
44  
45  
46  
47  
48  
49  
50  
51  
52  
53  
54  
55  
56  
57  
58  
59  
60

234 **Acknowledgements**

235 The authors would like to acknowledge the work of Olivia Marquez to assist with manuscript  
236 preparation and submission.

Confidential

237 **References**

- 238 1. Kaufman KJ. The Introduction of Midwifery in Ontario, Canada. *BIRTH*.  
239 1991;18(2):100–3.
- 240 2. Darling EK, Bennett N, Burton N, Marquez O. Outcomes of uninsured midwifery clients  
241 in Ontario, Canada: A retrospective cohort study. *Midwifery*. 2019 Oct;77:24–31.
- 242 3. College of Midwives of Ontario. Postpartum/Newborn Visits [Internet]. Toronto, ON;  
243 2015 [cited 2019 Jul 3]. Available from: [www.cmo.on.ca](http://www.cmo.on.ca)
- 244 4. Lutsiv O, Pullenayegum E, Foster G, Vera C, Giglia L, Chapman B, et al. Women’s  
245 intentions to breastfeed: A population-based cohort study. *BJOG An Int J Obstet*  
246 *Gynaecol*. 2013;120(12):1490–8.
- 247 5. O’Brien B, Chalmers B, Fell D, Heaman M, Darling EK, Herbert P. The Experience of  
248 Pregnancy and Birth with Midwives: Results from the Canadian Maternity Experiences  
249 Survey. *Birth*. 2011;38(3):207–15.
- 250 6. McDonald SD, Pullenayegum E, Chapman B, Vera C, Giglia L, Fusch C, et al. Prevalence  
251 and predictors of exclusive breastfeeding at hospital discharge. *Obstet Gynecol*.  
252 2012;119(6):1171–9.
- 253 7. Darj E, Stålnacke B. Very early discharge from hospital after normal deliveries. *Ups J*  
254 *Med Sci*. 2000;105(1):57–66.
- 255 8. Darling EK, Guttman A, Sprague AE, Ramsay T, Walker MC. Implementation of the  
256 Canadian Paediatric Society’s hyperbilirubinemia guidelines: A survey of Ontario  
257 hospitals. *Paediatr Child Heal*. 2014;19(3):133–7.
- 258 9. Watt S, Sword W, Krueger P. Longer postpartum hospitalization options – who stays, who  
259 leaves, what changes? *BMC Pregnancy Childbirth*. 2005 Dec 14;5(1):13.
- 260 10. Darling EK, Ramsay T, Sprague AE, Walker MC, Guttman A. Universal bilirubin  
261 screening and health care utilization. *Pediatrics*. 2014;134(4):e1017-24.
- 262 11. Guidelines for detection, management and prevention of hyperbilirubinemia in term and  
263 late preterm newborn infants (35 or more weeks’ gestation) – Summary. *Paediatr Child*  
264 *Health* [Internet]. 2007 May 1;12(5):401–7. Available from:  
265 <https://doi.org/10.1093/pch/12.5.401>
- 266 12. Provincial Council for Maternal & Child Health & Ministry of Health and Long-Term  
267 Care. Quality-Based Procedures Clinical Handbook for Hyperbilirubinemia in Term and  
268 Late Pre-Term Infants ( $\geq 35$  weeks) [Internet]. 2013 [cited 2019 Jul 3]. Available from:  
269 [https://www.wrh.on.ca/documents/26/Neonatal Jaundice Hyperbilirubinemia Sep](https://www.wrh.on.ca/documents/26/Neonatal%20Jaundice%20Hyperbilirubinemia%20Sep%202013.pdf)  
270 [2013.pdf](https://www.wrh.on.ca/documents/26/Neonatal Jaundice Hyperbilirubinemia Sep 2013.pdf)
- 271 13. Wilkins R, Khan S. PCCF + Version 5J User’s Guide [Internet]. 2011 [cited 2019 Jul 3].  
272 Available from: [http://publications.gc.ca/collections/collection\\_2018/statcan/CS82-0086-](http://publications.gc.ca/collections/collection_2018/statcan/CS82-0086-2009-1-eng.pdf)  
273 [2009-1-eng.pdf](http://publications.gc.ca/collections/collection_2018/statcan/CS82-0086-2009-1-eng.pdf)

- 1  
2  
3 274 14. Matheson FI, van Ingen T. 2016 Ontario marginalization index: user guide. Toronto, ON:  
4 275 St. Michael's Hospital; 2018. Joint publication with Public Health Ontario.
- 6 276 15. Allison P. Missing Data. Thousand Oaks: Sage Publications; 2001.
- 8 277 16. Metcalfe A, Mathai M, Liu S, Leon JA, Joseph KS. Proportion of neonatal readmission  
9 278 attributed to length of stay for childbirth: A population-based cohort study. *BMJ Open*.  
10 279 2016 Sep 14;6(9):e012007.
- 12 280 17. Canadian Paediatric Society, Society of Obstetricians and Gynaecologists of Canada.  
13 281 Policy statement: Early discharge and length of stay for term birth [Internet]. Vol. 18,  
14 282 Journal SOGC. 1996 [cited 2019 Jul 10]. Available from:  
15 283 [https://www.jogc.com/article/S0849-5831\(16\)30285-3/pdf](https://www.jogc.com/article/S0849-5831(16)30285-3/pdf)
- 18 284 18. Lemyre B, Jefferies AL, O'Flaherty P. Facilitating discharge from hospital of the healthy  
19 285 term infant. *Paediatr Child Heal*. 2018;23(8):515–22.
- 21 286 19. Public Health Agency of Canada. Canadian Hospitals Maternity Policies and Practices  
22 287 Survey. Ottawa; 2012.
- 24 288 20. Liu S, Wen SW, McMillan D, Trouton K, Fowler D, McCourt C. Increased neonatal  
25 289 readmission rate associated with decreased length of hospital stay at birth in Canada. *Can*  
26 290 *J public Heal*. 2000;91(1):46–50.
- 28 291 21. Kehler S. Hyperbilirubinemia of the Newborn: An Investigation of Midwifery Practice.  
29 292 Association of Ontario Midwives Midwifery Research Symposium. Hamilton, 2017.
- 31 293 22. Deluce S, Darling E. Non-indicated transfers of care from midwives to physicians in  
32 294 Ontario. *J Obstet Gynaecol Canada*. 2019;41(5):715.
- 34 295 23. Benahmed N, San Miguel L, Devos C, Fairon N, Christiaens W. Vaginal delivery: How  
35 296 does early hospital discharge affect mother and child outcomes? A systematic literature  
36 297 review. *BMC Pregnancy Childbirth*. 2017;17(1).
- 39 298 24. Biro MA, Waldenström U, Pannifex JH. Team midwifery care in a tertiary level obstetric  
40 299 service: a randomized controlled trial. *Birth*. 2000;27(3):168–73.
- 42 300 25. Butler M, Collins R, Drennan J, Halligan P, O'Mathúna DP, Schultz TJ, et al. Hospital  
43 301 nurse staffing models and patient and staff-related outcomes. *Cochrane Database Syst*  
44 302 *Rev*. 2011;(7).
- 46 303 26. Hutton EK, Reitsma AH, Kaufman K. Outcomes associated with planned home and  
47 304 planned hospital births in low-risk women attended by midwives in Ontario, Canada,  
48 305 2003-2006: A retrospective cohort study. *Birth*. 2009;36(3):180–9.
- 50 306 27. Hutton EK, Cappelletti A, Reitsma AH, Simioni J, Horne J, McGregor C, et al. Outcomes  
51 307 associated with planned place of birth among women with low-risk pregnancies. *CMAJ*.  
52 308 2016;188(5):e80–90.

309

1  
2  
3  
4  
5  
6  
7  
8  
9  
10  
11  
12  
13  
14  
15  
16  
17  
18  
19  
20  
21  
22  
23  
24  
25  
26  
27  
28  
29  
30  
31  
32  
33  
34  
35  
36  
37  
38  
39  
40  
41  
42  
43  
44  
45  
46  
47  
48  
49  
50  
51  
52  
53  
54  
55  
56  
57  
58  
59  
60

**Figure 1. Cohort creation**

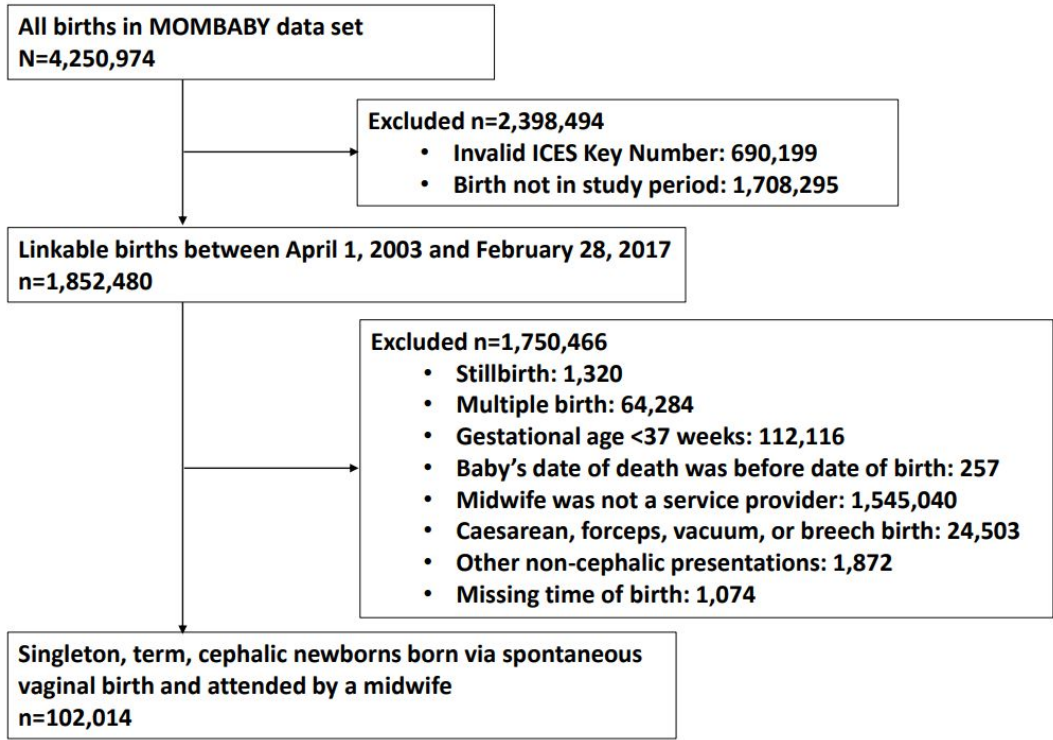

1 **Table 1: Baseline Characteristics by Newborn Length of Stay**

| Characteristic                | Length of Stay < 6 hours (N=32,447) | Length of Stay ≥ 6 hours (N=69,405) |
|-------------------------------|-------------------------------------|-------------------------------------|
| <b>Maternal Age</b>           |                                     |                                     |
| <20                           | 385 (1.2%)                          | 1,601 (2.3%)                        |
| 20-24                         | 2,890 (8.9%)                        | 8,202 (11.8%)                       |
| 25-29                         | 9,273 (28.6%)                       | 21,810 (31.4%)                      |
| 30-34                         | 13,416 (41.3%)                      | 26,352 (38.0%)                      |
| 35-39                         | 5,755 (17.7%)                       | 10,094 (14.5%)                      |
| ≥40                           | 728 (2.2%)                          | 1,346 (1.9%)                        |
| <b>Maternal Parity</b>        |                                     |                                     |
| Primiparous                   | 10,356 (31.9%)                      | 29,223 (42.1%)                      |
| Multiparous                   | 10,356 (31.9%)                      | 29,223 (42.1%)                      |
| <b>Gestational Age</b>        |                                     |                                     |
| 37-38                         | 5,339 (16.5%)                       | 12,876 (18.6%)                      |
| 39-40                         | 20,945 (64.6%)                      | 42,842 (61.7%)                      |
| ≥41                           | 6,143 (18.9%)                       | 13,660 (19.7%)                      |
| Missing                       | 20 (0.1%)                           | 27 (0.0%)                           |
| <b>Deprivation Quintile *</b> |                                     |                                     |
| 1 (Least deprived)            | 8,144 (25.1%)                       | 15,156 (21.8%)                      |
| 2                             | 7,171 (22.1%)                       | 14,491 (20.9%)                      |
| 3                             | 6,082 (18.7%)                       | 13,208 (19.0%)                      |
| 4                             | 5,480 (16.9%)                       | 12,344 (17.8%)                      |
| 5 (Most deprived)             | 5,025 (15.5%)                       | 12,856 (18.5%)                      |
| Missing                       | 545 (1.7%)                          | 1,350 (1.9%)                        |
| <b>Rural</b>                  |                                     |                                     |
| N                             | 29,376 (90.5%)                      | 60,525 (87.2%)                      |
| Y                             | 3,040 (9.4%)                        | 8,844 (12.7%)                       |
| Missing                       | 31 (0.1%)                           | 36 (0.1%)                           |
| <b>Maternal Risk Factors</b>  |                                     |                                     |
| Maternal Diabetes             | 154 (0.5%)                          | 1,453 (2.1%)                        |
| Maternal Hypertension         | 247 (0.8%)                          | 1,896 (2.7%)                        |

\* Ontario Marginalization Index Material Deprivation Quintile

2

1 **Table 2. Model of Very Early Discharge**

|                                                              | <b>Crude Rate of Early Discharge (%)</b> | <b>Relative Risk (95% Confidence Interval)</b> | <b>P Value</b> |
|--------------------------------------------------------------|------------------------------------------|------------------------------------------------|----------------|
| <b>Fiscal Year</b>                                           | -                                        | 1.00 (0.99, 1.00)                              | 0.3465         |
| <b>Parity</b>                                                |                                          |                                                |                |
| <b>Primiparous*</b>                                          | 26.17                                    |                                                |                |
| <b>Multiparous</b>                                           | 35.47                                    | 1.78( 1.73, 1.84)                              | <.0001         |
| <b>Rural</b>                                                 |                                          |                                                |                |
| <b>N*</b>                                                    | 32.68                                    |                                                |                |
| <b>Y</b>                                                     | 25.58                                    | 0.85( 0.80, 0.90)                              | <.0001         |
| <b>Material Deprivation Quintile</b>                         |                                          |                                                |                |
| <b>1 (High SES)*</b>                                         | 34.95                                    |                                                |                |
| <b>2</b>                                                     | 33.10                                    | 1.00( 0.95, 1.04)                              | 0.8189         |
| <b>3</b>                                                     | 31.53                                    | 0.97( 0.93, 1.02)                              | 0.2148         |
| <b>4</b>                                                     | 30.75                                    | 0.92( 0.88, 0.97)                              | 0.0008         |
| <b>5 (Low SES)</b>                                           | 28.10                                    | 0.81( 0.78, 0.85)                              | <.0001         |
| <b>Gestational Age at Birth in Weeks</b>                     |                                          |                                                |                |
| <b>39-40*</b>                                                | 32.84                                    |                                                |                |
| <b>37-38</b>                                                 | 29.31                                    | 0.88( 0.85, 0.91)                              | <.0001         |
| <b>≥41</b>                                                   | 31.02                                    | 0.88( 0.84, 0.91)                              | <.0001         |
| <b>Volume of Births Per Year at Hospital</b>                 |                                          |                                                |                |
| <b>&gt;2000*</b>                                             | 35.87                                    |                                                |                |
| <b>1001-2000</b>                                             | 27.14                                    | 0.91( 0.83, 1.00)                              | 0.0531         |
| <b>501-1000</b>                                              | 23.30                                    | 0.94( 0.78, 1.13)                              | 0.5202         |
| <b>≤500</b>                                                  | 27.38                                    | 0.92( 0.74, 1.15)                              | 0.4860         |
| <b>Proportion of Births Attended by Midwives at Hospital</b> |                                          |                                                |                |
| <b>&lt;10%*</b>                                              | 37.10                                    |                                                |                |
| <b>10-20%</b>                                                | 31.99                                    | 0.89( 0.84, 0.95)                              | 0.0001         |
| <b>&gt;20%</b>                                               | 26.74                                    | 0.83( 0.76, 0.90)                              | <.0001         |
| <b>Diabetes</b>                                              |                                          |                                                |                |
| <b>N*</b>                                                    | 32.21                                    |                                                |                |
| <b>Y</b>                                                     | 9.58                                     | 0.20( 0.17, 0.24)                              | <.0001         |
| <b>Hypertension</b>                                          |                                          |                                                |                |
| <b>N*</b>                                                    | 32.29                                    |                                                |                |
| <b>Y</b>                                                     | 11.53                                    | 0.28( 0.24, 0.32)                              | <.0001         |

\*Reference group

2



1  
2  
3  
4  
5  
6  
7  
8  
9  
10  
11  
12  
13  
14  
15  
16  
17  
18  
19  
20  
21  
22  
23  
24  
25  
26  
27  
28  
29  
30  
31  
32  
33  
34  
35  
36  
37  
38  
39  
40  
41  
42  
43  
44  
45  
46  
47  
48  
49  
50  
51  
52  
53  
54  
55  
56  
57  
58  
59  
60

Figure 2. Rate of Very Early Discharge by Fiscal Year

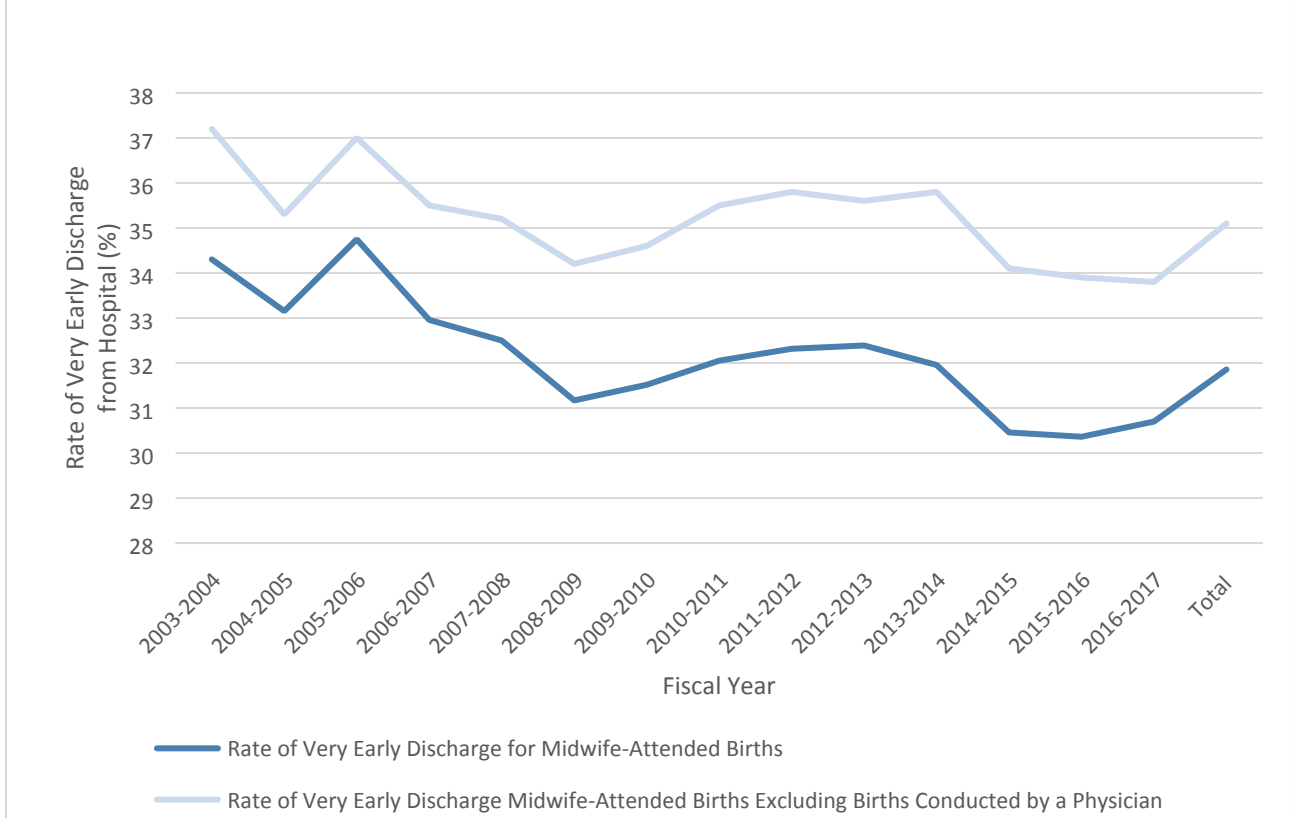

1  
2  
3  
4  
5  
6  
7  
8  
9  
10  
11  
12  
13  
14  
15  
16  
17  
18  
19  
20  
21  
22  
23  
24  
25  
26  
27  
28  
29  
30  
31  
32  
33  
34  
35  
36  
37  
38  
39  
40  
41  
42  
43  
44  
45  
46  
47  
48  
49  
50  
51  
52  
53  
54  
55  
56  
57  
58  
59  
60

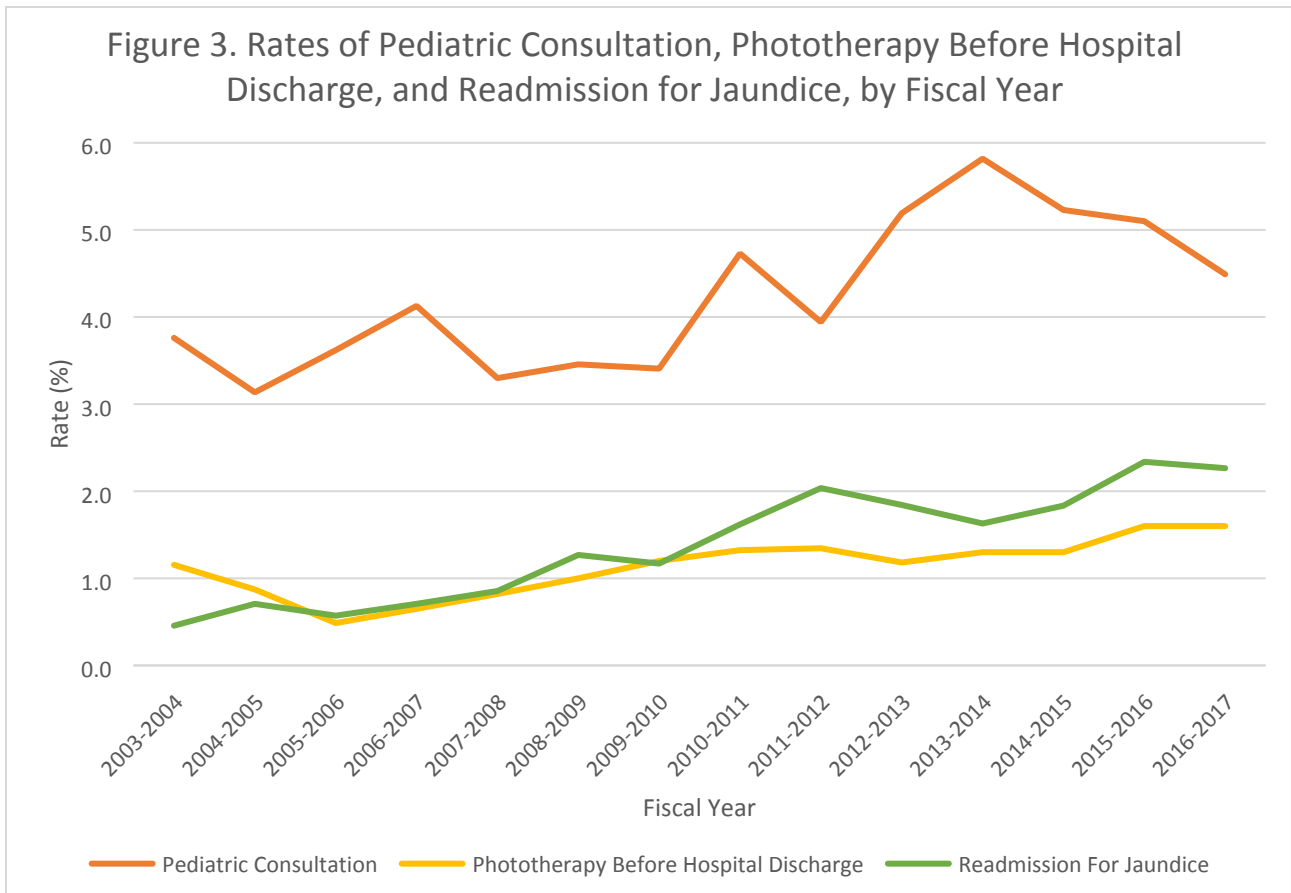

1

Figure 4. Hospital variation in rate of very early hospital discharge following spontaneous vaginal birth for Ontario newborns in midwifery care in 2016-17

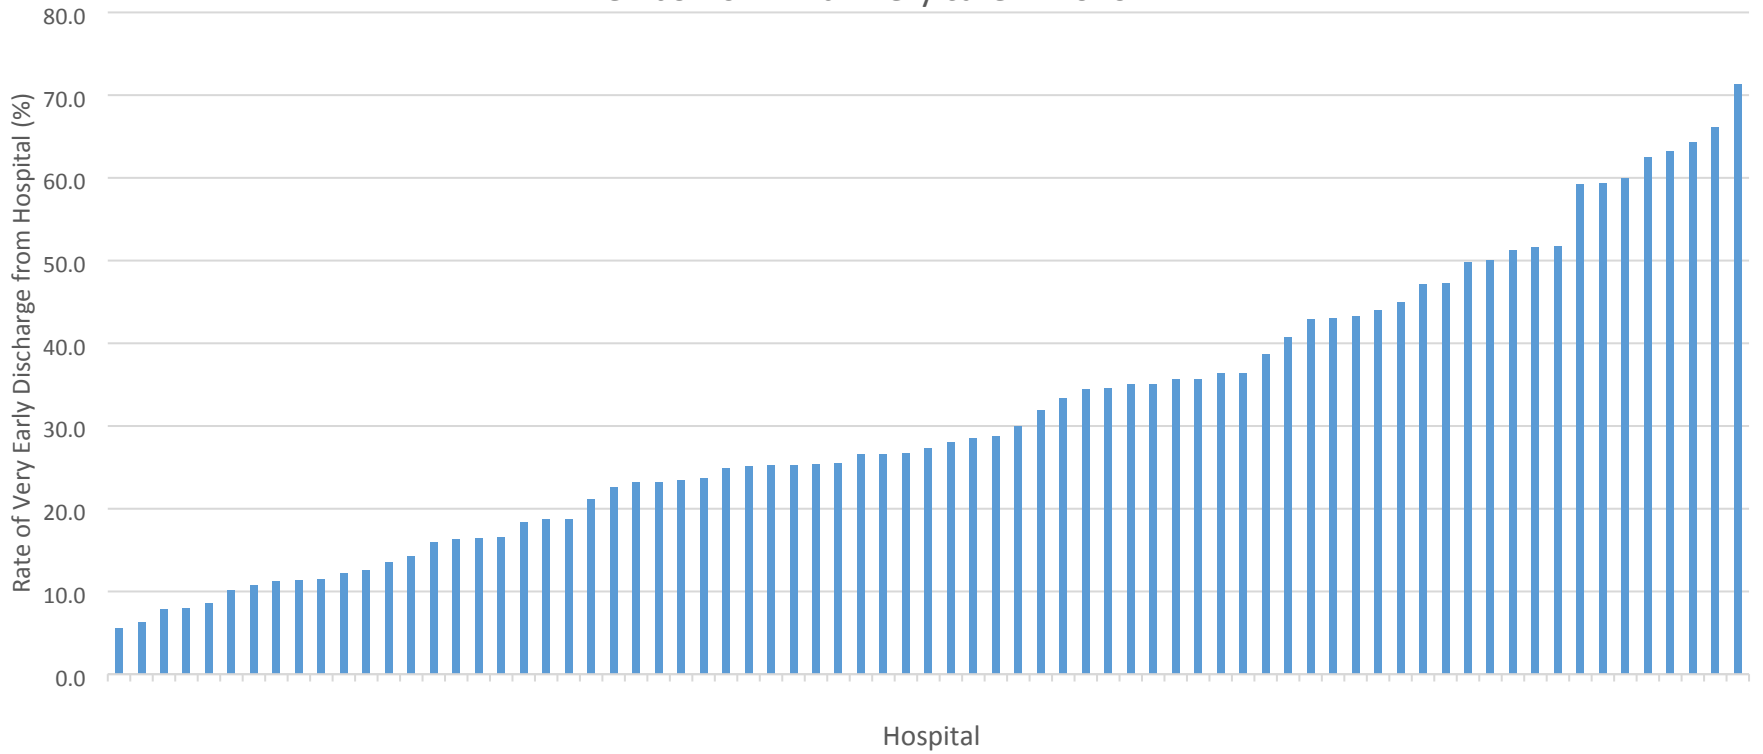

1  
2  
3  
4  
5  
6  
7  
8  
9  
10  
11  
12  
13  
14  
15  
16  
17  
18  
19  
20  
21  
22  
23  
24  
25  
26  
27  
28  
29  
30  
31  
32  
33  
34  
35  
36  
37  
38  
39  
40  
41  
42  
43  
44  
45  
46  
47

Figure 5. Variation in change in rates of very early hospital discharge following spontaneous vaginal birth for Ontario newborns in midwifery care between 2003-04 and 2016-17

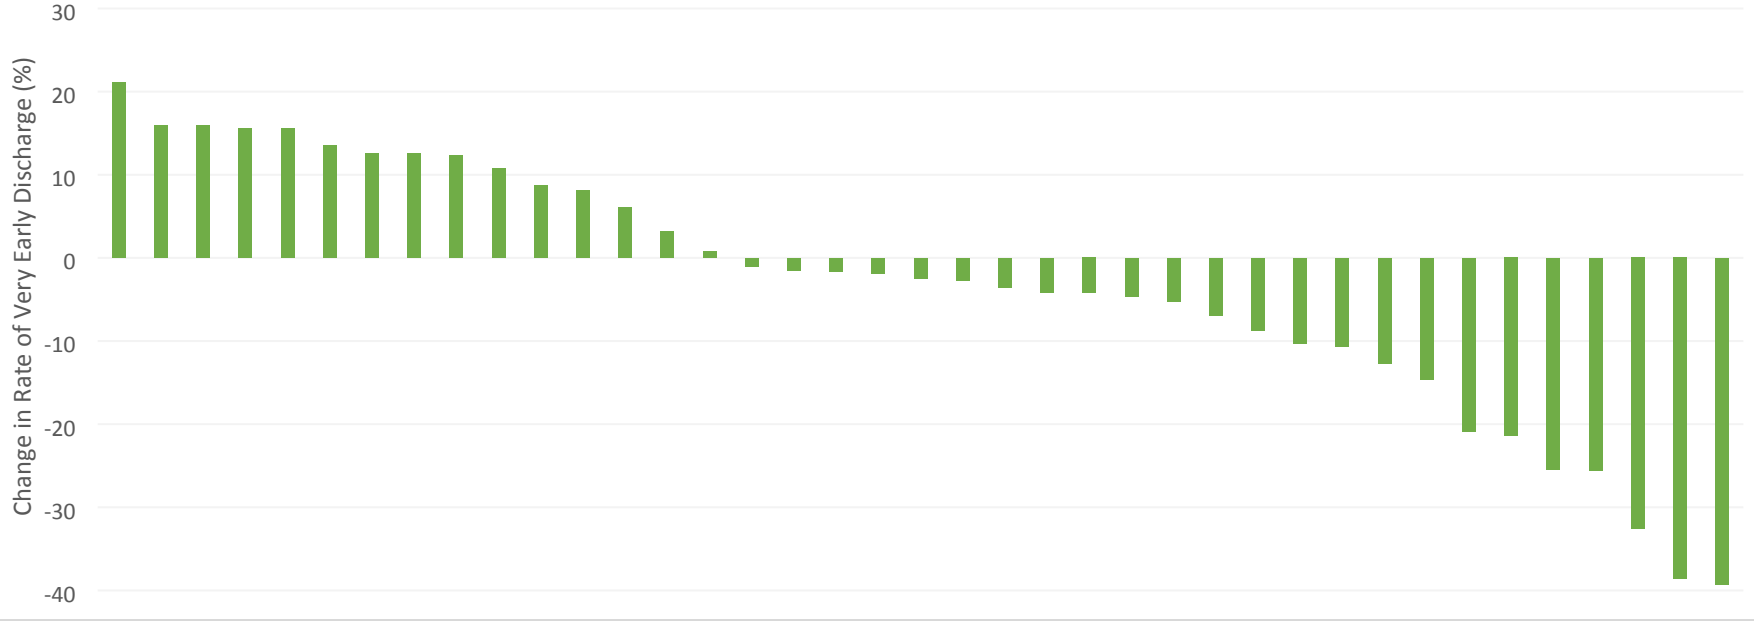

Supplement: 2019-0165-original-submission.pdf [file 2019-0165-original-submission.pdf]
